# Supplementary material for: Targeting monoamine oxidase A-regulated tumor-associated macrophage polarization for cancer immunotherapy
Source: PubMed Central journal article supplement (PMC8192781; doi:10.1038/s41467-021-23164-2), 2021-06-10
Supplement: 41467_2021_23164_MOESM1_ESM.pdf [file 41467_2021_23164_MOESM1_ESM.pdf]

# Supplementary information for

## **Targeting monoamine oxidase A-regulated tumor-associated macrophage polarization for cancer immunotherapy**

**Authors:** Yu-Chen Wang<sup>1</sup>, Xi Wang<sup>1</sup>, Jiaji Yu<sup>1</sup>, Feiyang Ma<sup>2</sup>, Zhe Li<sup>1</sup>, Yang Zhou<sup>1</sup>, Samuel Zeng<sup>1</sup>, Xiaoya Ma<sup>1</sup>, Yan-Ruide Li<sup>1</sup>, Adam Neal<sup>3,4</sup>, Jie Huang<sup>1</sup>, Angela To<sup>1</sup>, Nicole Clarke<sup>1</sup>, Sanaz Memarzadeh<sup>3,4,5,6,7</sup>, Matteo Pellegrini<sup>2</sup> & Lili Yang<sup>1,3,6,7,\*</sup>.

### **Affiliations:**

<sup>1</sup>Department of Microbiology, Immunology and Molecular Genetics. University of California, Los Angeles, CA, USA.

<sup>2</sup>Department of Molecular, Cell and Developmental Biology, and Institute for Genomics and Proteomics, University of California, Los Angeles, CA, USA.

<sup>3</sup>Eli and Edythe Broad Center of Regeneration Medicine and Stem Cell Research. University of California, Los Angeles, CA, United States.

<sup>4</sup>Department of Obstetrics and Gynecology, David Geffen School of Medicine, University of California, Los Angeles, Los Angeles, CA, USA

<sup>5</sup>The VA Greater Los Angeles Healthcare System, Los Angeles, CA, USA

<sup>6</sup>Jonsson Comprehensive Cancer Center, the David Geffen School of Medicine, University of California, Los Angeles, CA, USA.

<sup>7</sup>Molecular Biology Institute, University of California, Los Angeles, CA, USA.

\*Corresponding author. E-mail: [liliyang@ucla.edu](mailto:liliyang@ucla.edu)

The SI includes Supplementary figures 1-8 and Supplementary tables 1-3.

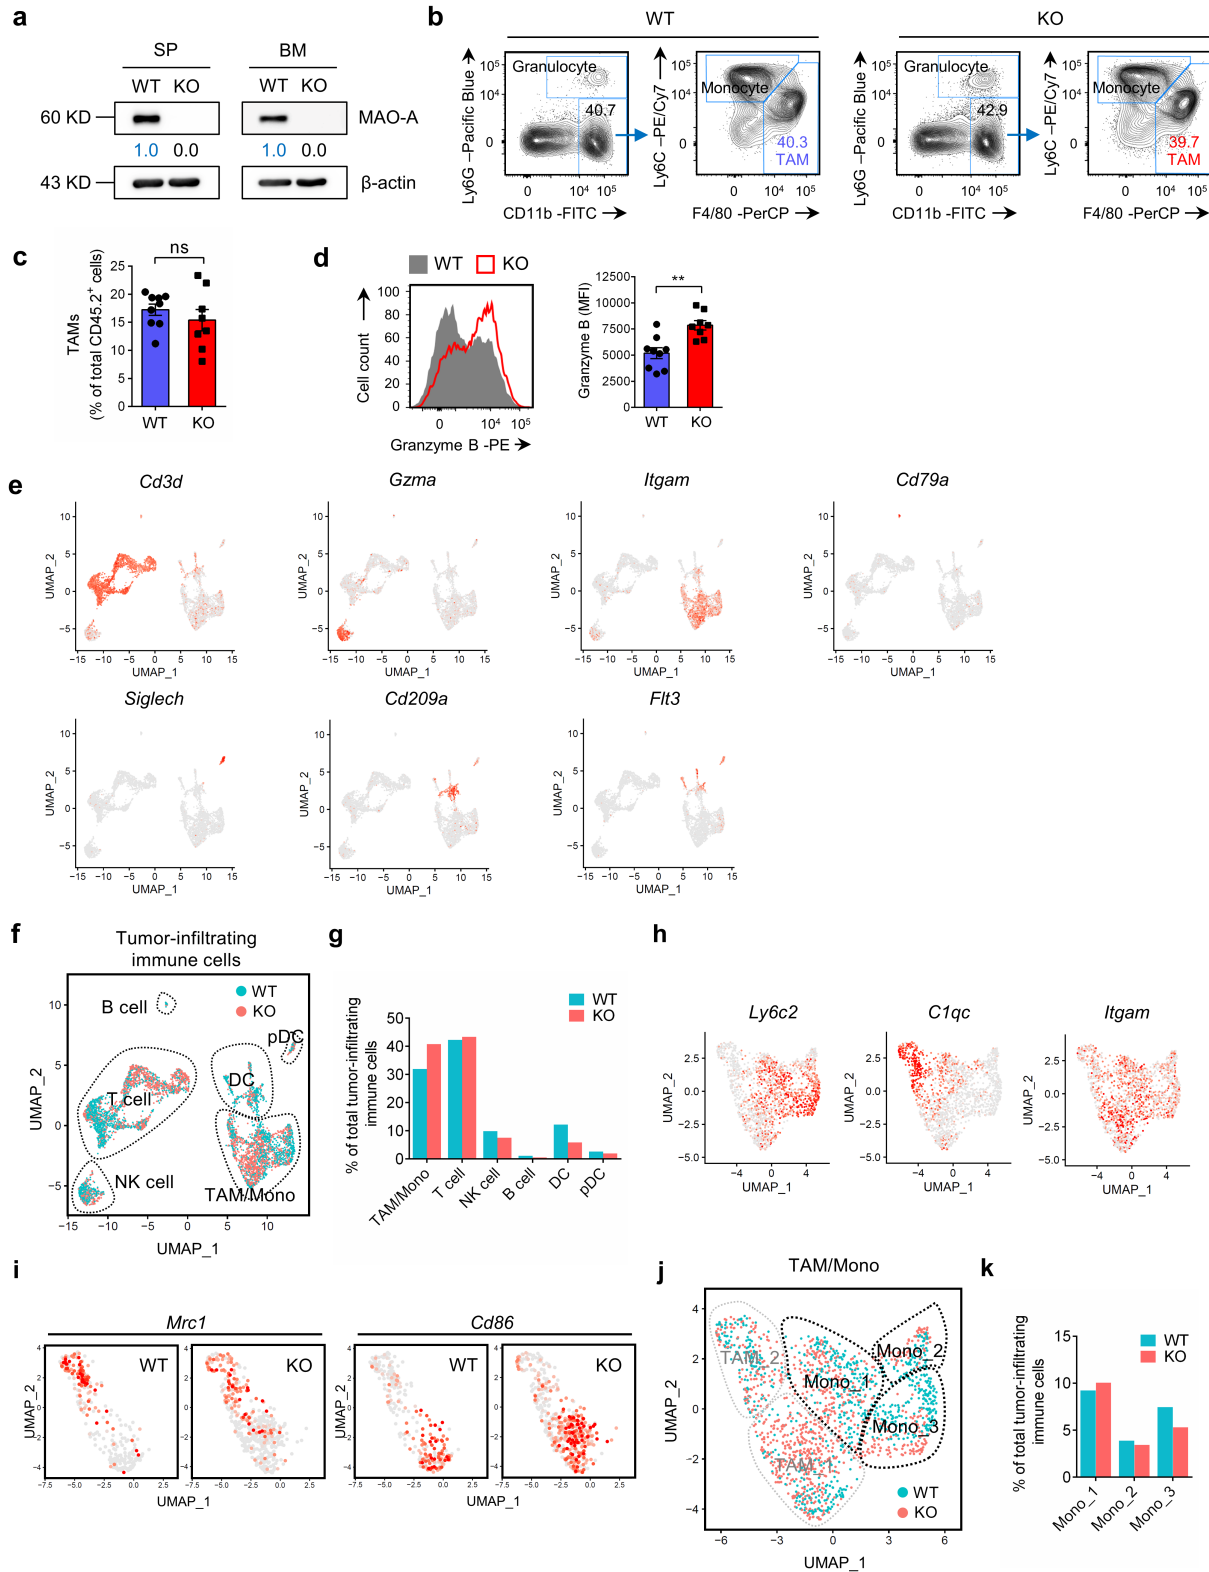

**Supplementary Figure 1. MAO-A-deficient mice show reduced tumor growth associated with altered TAM polarization.**

**a**, Western blot analyses of MAO-A protein expression in spleen (SP) and bone marrow (BM) cells harvested from *Maoa* WT (WT) and *Maoa* KO (KO) mice. Source data are provided as a Source Data file.

**b-d**, Phenotypes of TAMs and tumor-infiltrating CD8<sup>+</sup> T cells isolated from *Maoa* WT and *Maoa* KO mice bearing B16-OVA tumors, at day 18 post tumor challenge (WT, n = 9; KO, n = 8). **(b)** FACS gating strategy to identify TAMs (gated as CD45.2<sup>+</sup>CD11b<sup>+</sup>Ly6G<sup>-</sup>Ly6C<sup>-low</sup>F4/80<sup>+</sup> cells) from total tumor-infiltrating immune cells (TIIs). **(c)** FACS quantification of TAMs. **(d)** FACS analyses of intracellular Granzyme B production in tumor-infiltrating CD8<sup>+</sup> T cells (gated as CD45.2<sup>+</sup>TCRβ<sup>+</sup>CD8<sup>+</sup> cells from total TIIs) (\*\**p* = 0.0015).

**e-k**, scRNAseq analyses of TIIs isolated from *Maoa* WT or *Maoa* KO mice bearing B16-OVA tumors, at day 14 post tumor challenge. Uniform Manifold Approximation and Projection (UMAP) plots are presented. Each dot represents one single cell and is colored according to the expression level of an indicated gene. **(e)** UMAP of single TIIs, showing the expression patterns of 7 marker genes (*Cd3d*, *Gzma*, *Itgam*, *Cd79a*, *Siglech*, *Cd209a*, and *Flt3*) used to define 6 cell clusters (TAM/Mono, T cell, NK cell, B cell, DC, and pDC). TAM, tumor-associated macrophage; Mono, monocyte; NK, natural killer cell; DC, dendritic cell; pDC, plasmacytoid dendritic cell. **(f)** UMAP of single TIIs showing the formation of 6 cell clusters (TAM/Mono, T cell, NK cell, B cell, DC, and pDC). Each dot represents one single TII and is colored according to *Maoa* WT (blue) and *Maoa* KO (red) mice originalities. **(g)** Quantification of **(f)**. **(h)** UMAP of single cells of the TAM/Mono subpopulation, showing the expression patterns of 3 marker genes (*Ly6c2*, *C1qc*, and *Itgam*) used to define 5 cell clusters (TAM\_1, TAM\_2, Mono\_1, Mono\_2, and Mono\_3). **(i)** UMAP of single cells of the TAM\_1 and TAM\_2 subpopulations, showing the expression patterns of a pair of immunosuppressive and immunostimulatory signature genes (*Mrc1* and *Cd86*, respectively). **(j)** UMAP of monocyte subpopulation showing the formation of 3 monocyte clusters (Mono\_1, Mono\_2, and Mono\_3). Each dot represents one single cell and is colored according to *Maoa* WT (blue) and *Maoa* KO (red) mice originalities. **(k)** Quantification of **(j)**.

Representative of 1 (**e-k**), 2 (**a**), and 5 (**b-d**) experiments. All data are presented as the mean  $\pm$  SEM. ns, not significant,  $**p < 0.01$ , by Student's *t* test. Statistics are all two-sided. Source data are provided as a Source Data file.



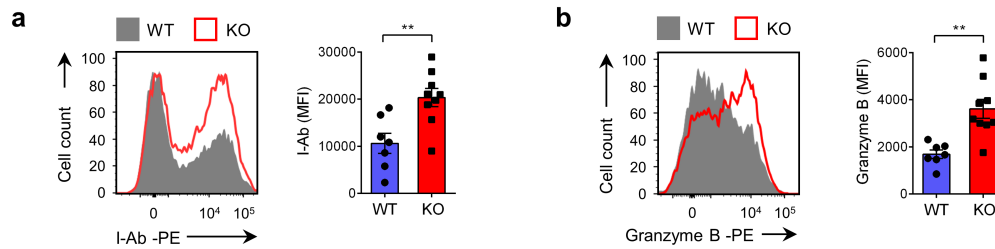

**Supplementary Figure 2. MAO-A directly regulates TAM polarization and influences TAM-associated antitumor T cell reactivity.**

BoyJ (CD45.1) wildtype (WT) mice reconstituted with bone marrow cells harvested from *Maoa* WT or *Maoa* KO donor mice (denoted as WT or KO mice, respectively) were inoculated with B16-OVA tumor cells. At day 18 post tumor challenge, TIIs were isolated from the experimental mice for FACS analysis.

**a**, FACS analyses of I-Ab expression on TAMs (gated as CD45.2<sup>+</sup>CD11b<sup>+</sup>Ly6G<sup>-/low</sup>F4/80<sup>+</sup> cells of total TIIs) (\*\**p* = 0.0046). WT, n = 7; KO, n = 9.

**b**, FACS analyses of Granzyme B intracellular production in tumor-infiltrating CD8<sup>+</sup> T cells (gated as CD45.2<sup>+</sup>TCRβ<sup>+</sup>CD8<sup>+</sup> cells of total TIIs) (\*\**p* = 0.0014). WT, n = 7; KO, n = 9.

Representative of 3 experiments. All data are presented as the mean ± SEM. \*\**p* < 0.01, by Student's *t* test. Statistics are all two-sided. Source data are provided as a Source Data file.

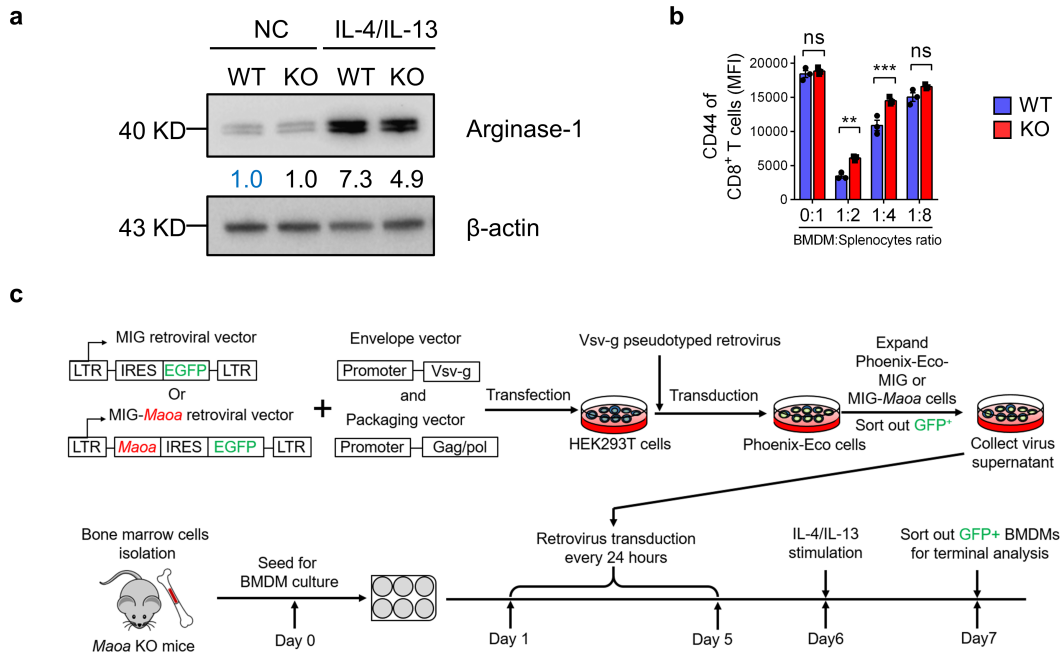

### Supplementary Figure 3. MAO-A promotes macrophage immunosuppressive polarization.

**a**, Western blot analyses of Arginase-1 protein expression in *Maoa* WT and *Maoa* KO BMDMs, with or without IL-4/IL-13 polarization. BMDMs were treated with IL-4/IL-13 for 24 hours. BMDMs, bone marrow-derived macrophages; NC, no cytokine control BMDMs; IL-4/IL-13, IL-4 and IL-13 polarized BMDMs. Source data are provided as a Source Data file.

**b**, Studying the T cell suppression function of *Maoa* WT (WT) and *Maoa* KO (KO) IL-4/IL-13-polarized BMDMs in an *in vitro* macrophage/T cell co-culture assay (n = 3). Polarized BMDMs were mixed with  $1 \times 10^6$  splenocytes harvested from B6 WT mice at 0:1, 1:2, 1:4, or 1:8 ratios. FACS quantifications of CD44 expression on CD8<sup>+</sup> T cells (identified as CD11b<sup>-</sup>TCR $\beta$ <sup>+</sup>CD8<sup>+</sup> cells) are presented (1:2, \*\* $p = 0.0028$ ; 1:4, \*\*\* $p < 0.001$ ).

**c**, Schematics showing the experimental design to overexpress MAO-A in *Maoa* KO BMDMs.

Representative of 2 (**a**) and 3 (**b**) experiments. All data are presented as the mean  $\pm$  SEM. ns, not significant, \*\* $p < 0.01$ , \*\*\* $p < 0.001$ , by 2-way ANOVA (A). Source data are provided as a Source Data file.

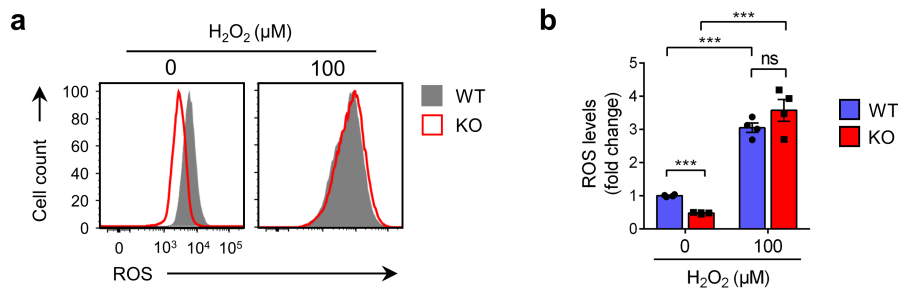

**Supplementary Figure 4. MAO-A promotes macrophage immunosuppressive polarization via ROS upregulation.**

*Maoa* WT and *Maoa* KO BMDMs (denoted as WT and KO, respectively) were treated with H<sub>2</sub>O<sub>2</sub> for 30 minutes followed by IL-4/IL-13 stimulation for another 30 minutes. BMDMs were then collected for FACS analysis. N = 4.

**a**, FACS plots showing ROS levels in the indicated BMDMs.

**b**, Quantification of A. \*\*\* $p < 0.001$ .

Representative of 2 experiments. All data are presented as the mean  $\pm$  SEM. ns, not significant, \*\*\* $p < 0.001$ , by 2-way ANOVA (**b**). Source data are provided as a Source Data file.

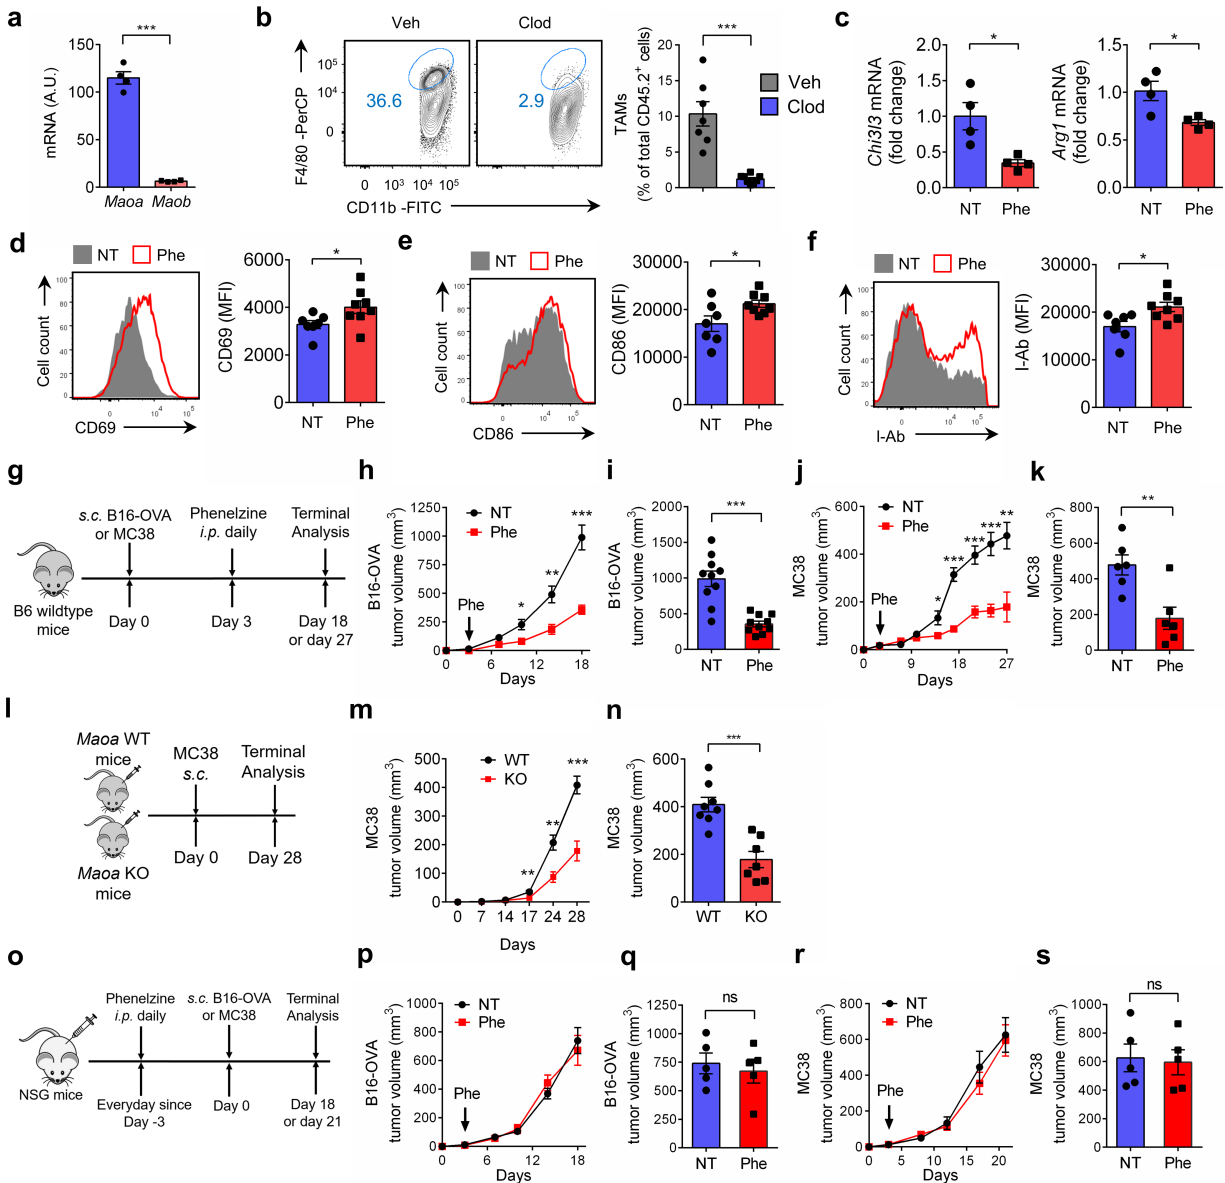

**Supplementary Figure 5. MAO-A blockade for cancer immunotherapy- syngeneic mouse tumor model studies.**

**a**, QPCR analyses of *Maoa* and *Maob* gene mRNA expression in B6 WT mice BMDMs (n = 4) (\*\**p* < 0.001).

**b**, Efficient depletion of TAMs in B6 WT mice bearing B16-OVA tumors through clodronate liposome treatment (Clod). Tumor-bearing mice treated with vehicle liposomes (Veh) were included as a control. The experimental design is shown in main Figure 5F. FACS quantifications of TAMs (gated as

CD45.2<sup>+</sup>CD11b<sup>+</sup>Ly6G<sup>-</sup>Ly6C<sup>-low</sup>F4/80<sup>+</sup> cells of total TIIs) are presented (Veh, n = 7; Clod, n = 8) (\*\**p* < 0.001).

**c**, QPCR analyses of *Chi3l3* and *Arg1* mRNA expression in TAMs isolated from B6 WT mice bearing B16-OVA tumors with or without phenelzine treatment (Phe or NT), TAMs were FACS purified from experimental mice at day 18 after tumor challenge (*Chi3l3*, \**p* = 0.016; *Arg1*, \**p* = 0.0198). N = 4.

**d-f**, FACS analyses of CD69 (**d**), CD86 (**e**), and I-Ab (**f**) expression on TAMs from B6 WT mice bearing B16-OVA tumors with or without phenelzine treatment (Phe or NT), TIIs were isolated from experimental mice at day 18 after tumor challenge (CD69, \**p* = 0.0435; CD86, \**p* = 0.0303; I-Ab, \**p* = 0.0148). TAMs were gated as CD45.2<sup>+</sup>CD11b<sup>+</sup>Ly6G<sup>-</sup>Ly6C<sup>-low</sup>F4/80<sup>+</sup> cells. MFI, mean fluorescence intensity. NT, n = 7; Phe, n = 8.

**g-k**, Studying B16-OVA and MC38 tumor growth in B6 WT mice with or without phenelzine treatment (Phe or NT). (**g**) Experimental design. (**h**) B16-OVA tumor growth over time (n = 10). (**i**) B16-OVA tumor volume at day 18 (\*\**p* < 0.001). (**j**) MC38 tumor growth over time (n = 6). (**k**) MC38 tumor volume at day 27 (\*\**p* = 0.0051).

**l-n**, Studying MC38 tumor growth in *Maoa* WT and KO mice. (**l**) Experimental design. (**m**) MC38 tumor growth over time. (**n**) MC38 tumor volume at day 28 (\*\**p* < 0.001). WT, n = 8; KO, n = 7.

**o-s**, Studying B16-OVA and MC38 tumor growth in NSG mice with or without phenelzine treatment (Phe or NT; n = 5). (**o**) Experimental design. (**p**) B16-OVA tumor growth. (**q**) B16-OVA tumor volume at day 18. (**r**) MC38 tumor growth. (**s**) MC38 tumor volume at day 21.

Representative of 2 (**a-k**) and 4 (**l-s**) experiments. All data are presented as the mean ± SEM. ns, not significant, \**p* < 0.05, \*\**p* < 0.01, \*\*\**p* < 0.001, by Student's *t* test (**a, b, c, d, e, f, i, k, n, q, s**). Statistics were all two-sided. Source data are provided as a Source Data file.

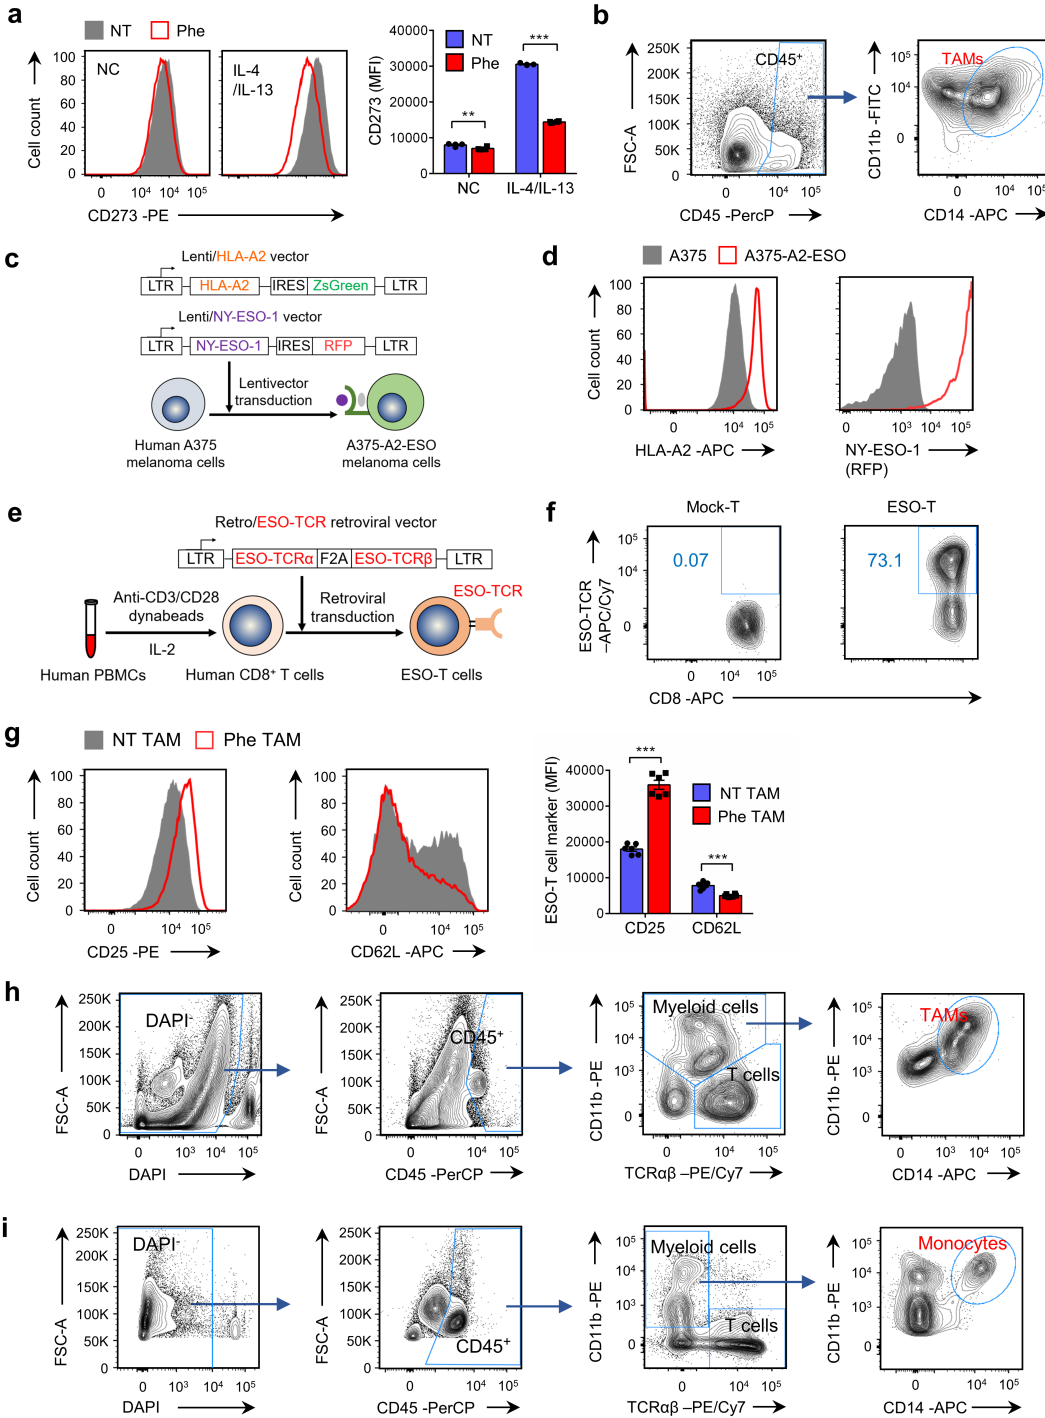

**Supplementary Figure 6. MAO-A blockade for cancer immunotherapy- human TAM and clinical data correlation studies.**

**a**, Studying the IL-4/IL-13-induced *in vitro* polarization of human monocyte-derived macrophages (MDMs) in the presence or absence of phenelzine (Phe) treatment. NC, no cytokine treatment; NT, no

The treatment. FACS analyses of CD273 expression on MDMs are presented (n = 3) (NC, \*\* $p = 0.0033$ ; IL-4/IL-13, \*\*\* $p < 0.001$ ).

**b**, FACS gating strategy to identify human TAMs (gated as hCD45<sup>+</sup>hCD11b<sup>+</sup>hCD14<sup>+</sup> cells of total TIIs) in a human Tumor-TAM Co-Inoculation xenograft mouse model. The experimental design is shown in main Figure 6h.

**c,d**, Generation of the A375-A2-ESO human melanoma cell line. **(c)** Experimental design. The A375-A2-ESO cell line was generated by stably co-transducing the parental A375 human melanoma cell line with a Lenti/HLA-A2 lentivector encoding the human HLA-A2 molecule and a Lenti/NY-ESO-1 lentivector encoding the human NY-ESO-1 tumor antigen. **(d)** FACS plots showing the detection of HLA-A2 molecule and NY-ESO-1 tumor antigen (indicated by RFP) on A375-A2-ESO cells. The parental A375 cells were included as a staining control.

**e,f**, Generation of the ESO-T cells. **(e)** Experimental design. Human peripheral blood mononuclear cells (hPBMCs) from healthy donors were stimulated *in vitro* with anti-CD3/CD28 and IL-2 to expand human CD8<sup>+</sup> T cells, followed by transduction with a Retro/ESO-TCR retrovector encoding an HLA-A2-restricted NY-ESO-1 specific TCR (clone 3A1). The resulting human CD8<sup>+</sup> T cells, denoted as the ESO-T cells, can specifically target the A375-A2-ESO human melanoma cells. **(f)** FACS plots showing the transduction efficiency of the engineered human CD8<sup>+</sup> ESO-T cells. Human CD8<sup>+</sup> T cells that received mock transduction were included as a staining control (denoted as Mock-T).

**g**, Studying the *in vitro* efficacy of phenelzine in reprogramming human TAMs and enhancing human T cell antitumor reactivity in an *in vitro* 3D human tumor/TAM/T cell organoid culture. The experimental design is shown in main Figure 6k. FACS plots showing the surface expression of CD25 and CD62L on ESO-T cells (n = 6). \*\*\* $p < 0.001$ .

**h**, FACS sorting of human TAMs from primary ovarian cancer patient tumor samples. Tumor-infiltrating immune cells were isolated from fresh ovarian cancer patient tumor samples and then were subjected to

FACS sorting to isolate TAMs (identified as DAPI<sup>+</sup>CD45<sup>+</sup>CD11b<sup>+</sup>TCR $\alpha\beta$ <sup>-</sup>CD14<sup>+</sup> cells). Representative FACS plots are presented (n = 4).

**i**, FACS sorting of primary human monocytes from random healthy donor blood samples. PBMCs were subjected to FACS sorting to isolate monocytes (identified as DAPI<sup>+</sup>CD45<sup>+</sup>CD11b<sup>+</sup>TCR $\alpha\beta$ <sup>-</sup>CD14<sup>+</sup> cells). Representative FACS plots are presented (n = 10).

Representative of 3 (**a-g**) and 4 (**h-i**) experiments. All data are presented as the mean  $\pm$  SEM. \*\* $p < 0.01$ , \*\*\* $p < 0.001$ , by 2-way ANOVA (**a, g**). Source data are provided as a Source Data file.



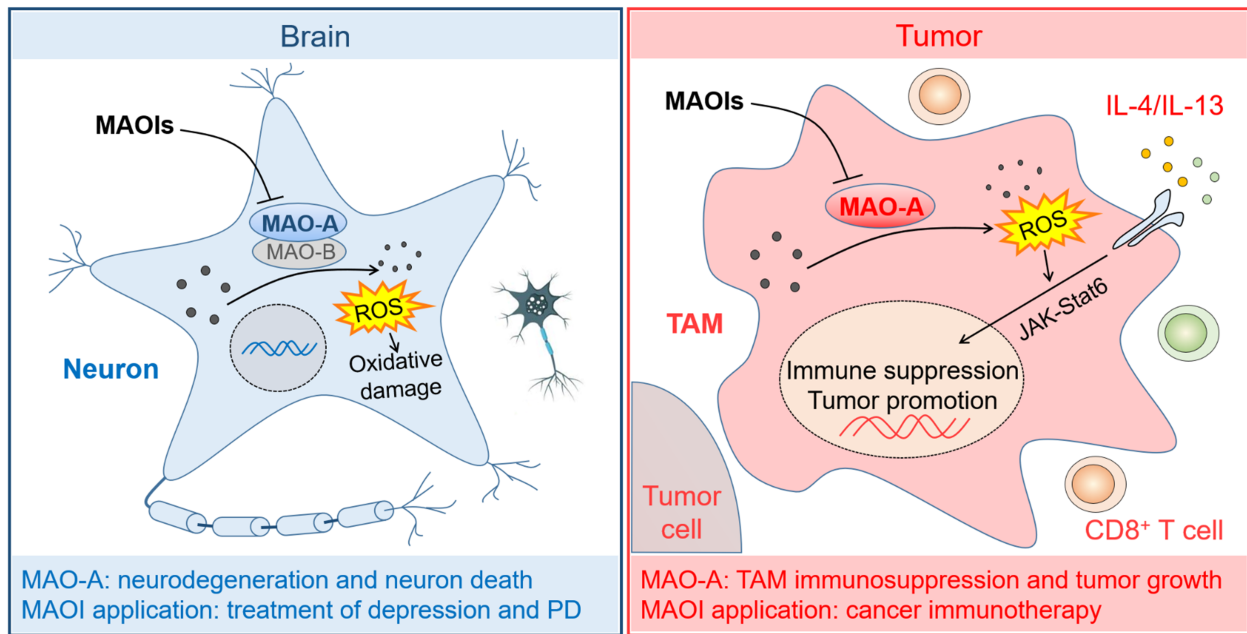

**Supplementary Figure 7. The “intratumoral MAO-A-ROS axis” model.**

Schematics showing the “intratumoral MAO-A-ROS axis” model. (Left Panel) Function of MAO-A in the brain. Neurons express MAO-A (as well as its isoenzyme MAO-B) that degrades monoamine neurotransmitters (e.g., dopamine, noradrenaline, and serotonin), thereby regulating neuron signal transmission. Meanwhile, the enzymatic activity of MAO-A generates hydrogen peroxide as a byproduct and thereby upregulating ROS levels (hence, oxidative stress) in neurons. Excessive oxidative stress induces the destruction of neuron cellular components and ultimately leading to neurodegeneration and neuron death. Small molecule monoamine oxidase inhibitors (MAOIs) have been developed and clinically utilized for treating neuropsychiatric disorders, such as depression, and neurodegeneration diseases, such as Parkinson’s disease. (Right Panel) Function of MAO-A in a tumor. Analogous to neurons in the brain, TAMs in the tumor microenvironment also express MAO-A, that controls TAM intracellular ROS levels by hydrogen peroxide production, thereby regulating TAM immunosuppressive polarization and subsequently CD8<sup>+</sup> T cell antitumor reactivity. Established MAOI antidepressants can potentially be repurposed for improving cancer immunotherapy, through targeting the “MAO-A-ROS axis” of TAM polarization in tumors. Notably, unlike neurons that co-express MAO-A and MAO-B, TAMs in particular the immunosuppressive TAMs predominantly express MAO-A.

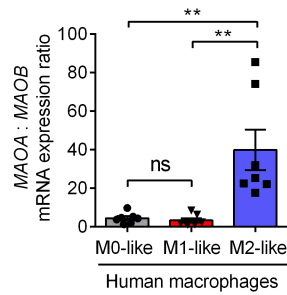

**Supplementary Figure 8. *MAOA:MAOB* gene expression profile in human macrophages.**

Comparing *MAOA:MAOB* gene expression ratio in human M0-, M1- and M2-like macrophages by analyzing a transcriptome data set (GSE35449). Each dot represents one single sample ( $n = 7$ ) (M0-like:M2-like,  $**p = 0.0019$ ; M1-like:M2-like,  $**p = 0.0014$ ).

All data are presented as the mean  $\pm$  SEM. ns, not significant, by 1-way ANOVA. Source data are provided as a Source Data file.

**Supplementary Table 1. Information for the ovarian cancer tumor samples.**

| Sample number | Diagnosis                                                                                                                            | Tumor provided |
|---------------|--------------------------------------------------------------------------------------------------------------------------------------|----------------|
| 1             | Stage IIIC ovarian cancer (high grade serous adenocarcinoma type), status post neoadjuvant chemotherapy (3 cycles Carboplatin/Taxol) | Ovarian tumor  |
| 2             | Synchronous stage IA ovarian adenocarcinoma and stage IA uterine adenocarcinoma (endometrioid type, FIGO grade 1)                    | Adnexal tumor  |
| 3             | Dedifferentiated carcinoma, FIGO grade III                                                                                           | Ovarian tumor  |
| 4             | High grade serous ovarian carcinoma, stage IIIC                                                                                      | Omental tumor  |

**Supplementary Table 2. Reagent information.**

| REAGENT                                                          | SOURCE         | IDENTIFIER                    | DILUTION |
|------------------------------------------------------------------|----------------|-------------------------------|----------|
| Antibodies                                                       |                |                               |          |
| Purified Anti-Mouse CD16/CD32 (Mouse Fc Block)                   | BD Biosciences | CAT#553142; RRID: AB_394657   | 1:50     |
| Anti-mouse CD4 Antibody (Clone GK1.5)                            | Biolegend      | CAT#100428; RRID: AB_493647   | 1:500    |
| Anti-mouse CD8a Antibody (Clone 53-6.7)                          | Biolegend      | CAT#100732; RRID: AB_893423   | 1:500    |
| Anti-mouse CD25 Antibody (Clone PC61)                            | Biolegend      | CAT#102008; RRID: AB_312857   | 1:100    |
| Anti-mouse TCR $\beta$ chain Antibody (Clone H57-597)            | Biolegend      | CAT#109220; RRID: AB_893624   | 1:200    |
| Anti-mouse/human CD44 Antibody (Clone IM7)                       | Biolegend      | CAT#103006; RRID: AB_312957   | 1:2000   |
| Anti-mouse CD62L Antibody (Clone MEL-14)                         | Biolegend      | CAT#104412; RRID: AB_313099   | 1:2000   |
| Anti-mouse CD45.2 Antibody (Clone 104)                           | Biolegend      | CAT#109830; RRID: AB_1186098  | 1:500    |
| Anti-mouse CD45.1 Antibody (Clone A20)                           | Biolegend      | CAT#110716; RRID: AB_313505   | 1:500    |
| Anti-human/mouse Granzyme B Recombinant Antibody (Clone QA16A02) | Biolegend      | CAT#372208; RRID: AB_2687032  | 1:100    |
| Anti-mouse F4/80 Antibody (Clone BM8)                            | Biolegend      | CAT#123126; RRID: AB_893483   | 1:200    |
| Anti-mouse/human CD11b Antibody (Clone M1/70)                    | Biolegend      | CAT#101206; RRID: AB_312789   | 1:1000   |
| Anti-mouse Ly-6C Antibody (Clone HK1.4)                          | Biolegend      | CAT#128018; RRID: AB_1732082  | 1:2000   |
| Anti-mouse CD69 Antibody (Clone H1.2F3)                          | Biolegend      | CAT#104508; RRID: AB_313111   | 1:200    |
| Anti-mouse I-Ab Antibody (Clone AF6-120.1)                       | Biolegend      | CAT#116420; RRID: AB_10575296 | 1:2000   |
| Anti-mouse CD86 Antibody (Clone GL-1)                            | Biolegend      | CAT#105012; RRID: AB_493342   | 1:1000   |
| Anti-mouse Ly-6G Antibody (Clone 1A8)                            | Biolegend      | CAT#127612; RRID: AB_2251161  | 1:500    |
| Anti-mouse CD206 (MMR) Antibody (Clone C068C2)                   | Biolegend      | CAT#141720; RRID: AB_2562248  | 1:200    |
| Human Fc Receptor Blocking Solution (TrueStain FcX)              | Biolegend      | CAT#422302                    | 1:50     |
| Anti-human TCR(alpha)(beta) (Clone I26)                          | Biolegend      | CAT#306716; RRID: AB_1953257  | 1:50     |
| Anti-human CD45 (Clone H130)                                     | Biolegend      | CAT#304026; RRID: AB_893337   | 1:100    |
| Anti-human CD4 (Clone OKT4)                                      | Biolegend      | CAT#317414; RRID: AB_571959   | 1:400    |

|                                                                    |                   |                                    |        |
|--------------------------------------------------------------------|-------------------|------------------------------------|--------|
| Anti-human CD8 (Clone SK1)                                         | Biolegend         | CAT#344714, RRID:<br>AB_2044006    | 1:200  |
| Anti-human CD14 (Clone HCD14)                                      | Biolegend         | CAT#325608, RRID:<br>AB_830681     | 1:200  |
| Anti-human CD11b (Clone ICRF44)                                    | Biolegend         | CAT#301330, RRID:<br>AB_2561703    | 1:100  |
| Anti-human CD206 (MMR) Antibody<br>(Clone 15-2)                    | Biolegend         | CAT#321110, RRID:<br>AB_571885     | 1:100  |
| Anti-human CD62L Antibody (Clone<br>DREG-56)                       | Biolegend         | CAT#304810, RRID:<br>AB_314470     | 1:100  |
| Anti-human CD273 (B7-DC, PD-L2)<br>Antibody (Clone 24F.10C12)      | Biolegend         | CAT#329606, RRID:<br>AB_1089019    | 1:100  |
| Rat IgG2b, $\kappa$ isotype control antibody<br>(Clone eB149/10H5) | eBioscience       | CAT#17-4031-82,<br>RRID: AB_470176 | 1:100  |
| Mouse IgG2b, $\kappa$ isotype control<br>antibody (Clone MPC-11)   | Biolegend         | CAT#400320                         | 1:100  |
| Jak1 (6G4) Rabbit mAb                                              | Cell<br>Signaling | CAT#3344                           | 1:2000 |
| Phospho-Jak1(Tyr1034/1035)<br>(D7N4Z) Rabbit mAb                   | Cell<br>Signaling | CAT#74129                          | 1:2000 |
| Jak2 (D2E12) XP® Rabbit mAb                                        | Cell<br>Signaling | CAT#3230                           | 1:2000 |
| Phospho-Jak2 (Tyr1008) (D4A8)<br>Rabbit mAb                        | Cell<br>Signaling | CAT#8082                           | 1:2000 |
| Jak3 (D7B12) Rabbit mAb                                            | Cell<br>Signaling | CAT#8863                           | 1:2000 |
| Phospho-Jak3 (Tyr980/981) (D44E3)<br>Rabbit mAb                    | Cell<br>Signaling | CAT#5031                           | 1:2000 |
| Phospho-Stat6 (Tyr641) (D8S9Y)<br>Rabbit mAb                       | Cell<br>Signaling | CAT#56554                          | 1:2000 |
| Stat6 (D3H4) Rabbit mAb                                            | Cell<br>Signaling | CAT#5397                           | 1:2000 |
| Arginase-1 (D4E3M™) XP® Rabbit<br>mAb                              | Cell<br>Signaling | CAT#93668                          | 1:2000 |
| Anti-rabbit IgG, HRP-linked Antibody                               | Cell<br>Signaling | CAT#7074                           | 1:5000 |
| Rabbit Anti-Monoamine Oxidase<br>A/MAO-A antibody (EPR7101)        | Abcam             | CAT#ab126751                       | 1:2000 |
| $\beta$ -Actin Antibody (AC-15)                                    | Santa Cruz        | CAT#sc-69879                       | 1:5000 |
| Anti-mouse IgG, HRP-linked<br>Antibody                             | Cell<br>Signaling | CAT#7076                           | 1:5000 |

**Supplementary Table 3. Primers used for QPCR.**

| Gene                                           | Forward Primer 5'-3'    | Reverse Primer 5'-3'    |
|------------------------------------------------|-------------------------|-------------------------|
| <i>Ube2d2</i>                                  | ACAAGGAATTGAATGACCTGGC  | CACCCTGATAGGGGCTGTC     |
| <i>Mrc1</i>                                    | CTCTGTTTCAGCTATTGGACGC  | CGGAATTTCTGGGATTCAGCTTC |
| <i>Chi3l3</i>                                  | CAGGTCTGGCAATTCTTCTGAA  | GTCTTGCTCATGTGTGTAAGTGA |
| <i>Arg1</i>                                    | TGTCCCTAATGACAGCTCCTT   | GCATCCACCCAAATGACACAT   |
| <i>Il6</i>                                     | CTGCAAGAGACTTCCATCCAG   | AGTGGTATAGACAGGTCTGTTGG |
| <i>Tnf</i>                                     | AAGCCTGTAGCCCACGTCGTA   | AGGTACAACCCATCGGCTGG    |
| <i>Ccl2</i>                                    | TTAAAAACCTGGATCGGAACCAA | GCATTAGCTTCAGATTTACGGGT |
| <i>Maoa</i>                                    | CCTGGTATCATGACTCTGTATGG | CTTGGACTCAGGCTCTTGAAC   |
| <i>Maob</i>                                    | ATGAGCAACAAAAGCGATGTGA  | TCCTAATTGTGTAAGTCCTGCCT |
| <i>Maoa</i> (for MIG- <i>Maoa</i> retrovector) | GTACCCGCTTTGGAGATAAC    | GAAGGGCCACTGATGTGGAA    |
| <i>ACTB</i>                                    | GAGCACAGAGCCTCGCCTTT    | ACATGCCGGAGCCGTTGTC     |
| <i>MAOA</i>                                    | GTCTTAAATGGTCTCGGGAAGG  | CCAGAAGGTGTGGGTGATTT    |
| <i>ALOX15</i>                                  | GGGCAAGGAGACAGAACTCAA   | CAGCGGTAACAAGGGAACCT    |
| <i>CD200R1</i>                                 | TGGTTGTTGAAAGTCAATGGCT  | CTCAGATGCCTTCACCTTGTTT  |
